## RESEARCH ARTICLE

NF $\kappa$ B signaling in alveolar rhabdomyosarcomaMegan M. Cleary<sup>1,2,\*</sup>, Atiya Mansoor<sup>3</sup>, Teagan Settlemeyer<sup>1</sup>, Yuichi Ijiri<sup>4</sup>, Katherine J. Ladner<sup>4</sup>, Matthew N. Svalina<sup>1</sup>, Brian P. Rubin<sup>5</sup>, Denis C. Guttridge<sup>4,\*</sup> and Charles Keller<sup>1,\*</sup>

## ABSTRACT

Alveolar rhabdomyosarcoma (aRMS) is a pediatric soft tissue cancer commonly associated with a chromosomal translocation that leads to the expression of a Pax3:Foxo1 or Pax7:Foxo1 fusion protein, the developmental underpinnings of which may give clues to its therapeutic approaches. In aRMS, the NF $\kappa$ B–YY1–miR-29 regulatory circuit is dysregulated, resulting in repression of *miR-29* and loss of the associated tumor suppressor activity. To further elucidate the role of NF $\kappa$ B in aRMS, we first tested 55 unique sarcoma cell lines and primary cell cultures in a large-scale chemical screen targeting diverse molecular pathways. We found that pharmacological inhibition of NF $\kappa$ B activity resulted in decreased cell proliferation of many of the aRMS tumor cultures. Surprisingly, mice that were orthotopically allografted with aRMS tumor cells exhibited no difference in tumor growth when administered an NF $\kappa$ B inhibitor, compared to control. Furthermore, inhibition of NF $\kappa$ B by genetically ablating its activating kinase inhibitor, *IKK $\beta$* , by conditional deletion in a mouse model harboring the *Pax3:Foxo1* chimeric oncogene failed to abrogate spontaneous tumor growth. Genetically engineered mice with conditionally deleted *IKK $\beta$*  exhibited a paradoxical decrease in tumor latency compared with those with active NF $\kappa$ B. However, using a synthetic-lethal approach, primary cell cultures derived from tumors with inactivated NF $\kappa$ B showed sensitivity to the BCL-2 inhibitor navitoclax. When used in combination with an NF $\kappa$ B inhibitor, navitoclax was synergistic in decreasing the growth of both human and *IKK $\beta$*  wild-type mouse aRMS cells, indicating that inactivation of NF $\kappa$ B alone may not be sufficient for reducing tumor growth, but, when combined with another targeted therapeutic, may be clinically beneficial.

**KEY WORDS:** Rhabdomyosarcoma, NF $\kappa$ B, *IKK $\beta$* , Cancer

## INTRODUCTION

Rhabdomyosarcoma (RMS) is an aggressive soft tissue cancer affecting approximately 350 people in the United States annually (Breitfeld and Meyer, 2005; Reis LAG et al., 1999). RMS is one of the most common pediatric sarcomas and, when diagnosed at

advanced stages, carries a dismal outcome. The disease is divided into two major subtypes, embryonal (eRMS) and alveolar (aRMS), the latter of which is believed to often arise from the *Myf6* myogenic lineage (Abraham et al., 2014; Keller et al., 2004a; Keller and Capecchi, 2004). aRMS is more aggressive than eRMS and displays a poorly differentiated phenotype (Qualman et al., 2008). aRMS tumors exhibit a unique genetic profile, with 85% of aRMS cases associated with a t(2;13) or t(1;13) chromosomal translocation that results in the fusion of the Pax3 or Pax7 DNA-binding homeo- and paired-domains to the transactivation domain of the transcription factor Foxo1 (Davis et al., 1994; Galili et al., 1993). This fusion protein drives tumor cells into a state recapitulating fetal myogenic precursors (Keller et al., 2004a,b; Keller and Capecchi, 2004). Despite intensive chemotherapy and radiation, aRMS carries only a 71% survival rate when localized. When metastatic, 5-year survival is below 20% (Ognjanovic et al., 2009). Despite scientific advances over the last 30 years, mortality and morbidity rates for RMS have remained stagnant (Malempati and Hawkins, 2012; Ognjanovic et al., 2009) and thus novel treatments are needed.

The NF $\kappa$ B transcription factor family is a highly conserved group of proteins consisting of RelA/p65 (p65), c-Rel, Rel-B, p60/p105 and p52/p100. These factors are maintained as homodimers and heterodimers, and are involved in a wide range of normal cellular processes such as differentiation, apoptosis, senescence, cell survival and immune responses, as well as aberrant cellular events sometimes leading to muscle disorders and oncogenesis (Bakkar et al., 2008; Di Marco et al., 2005; Dolcet et al., 2005; Guttridge et al., 1999; Mourkioti et al., 2006; Wang et al., 2009). These proteins all contain the same N-terminal Rel homology domain (RHD) necessary for DNA binding, dimerization, and interaction with inhibitory I $\kappa$ B proteins (Bakkar et al., 2008; Baldwin, 1996; Ghosh et al., 1998); however, only p65, c-Rel and RelB contain the transactivation domain required for transcription (Hayden and Ghosh, 2004). In an inactive state, NF $\kappa$ B dimers are bound to I $\kappa$ B factors such as I $\kappa$ B $\alpha$  or I $\kappa$ B $\beta$ , which mask the nuclear localization signal of the RHD, effectively retaining the inactive NF $\kappa$ B complex in the cytoplasm (Ghosh et al., 1998; Liou, 2002). The dimers are released and become transcriptionally active when the I $\kappa$ B protein degrades owing to phosphorylation by one of the I $\kappa$ B kinase (IKK) complexes, either IKK $\alpha$ , IKK $\beta$  or IKK $\gamma$  (Perkins, 2006).

Although NF $\kappa$ B is present and active in many different cell types, its role is particularly complex in skeletal muscle development and maintenance, where NF $\kappa$ B serves dual, complex functions as a result of two distinct activation pathways (Bakkar and Guttridge, 2010; Bakkar et al., 2008; Wang et al., 2009). The alternative NF $\kappa$ B signaling pathway regulates mitochondrial biogenesis, energy production and muscle homeostasis (Bakkar et al., 2008), and is mediated through IKK $\alpha$  phosphorylation of p100 (Xiao et al., 2004). The classical signaling pathway is activated by TNF $\alpha$ , followed by IKK $\beta$  phosphorylation of I $\kappa$ B $\alpha$ , resulting in translocation of p65 to the nucleus. This pathway acts during myoblast proliferation and utilizes several different mechanisms to prevent premature differentiation,

<sup>1</sup>Children's Cancer Therapy Development Institute, Beaverton, OR 97005, USA.

<sup>2</sup>Department of Pediatrics, Oregon Health and Science University, Portland, OR 97239, USA. <sup>3</sup>Department of Pathology, Oregon Health and Science University, Portland, OR 97239, USA. <sup>4</sup>Department of Cancer Biology and Genetics and The Arthur G. James Comprehensive Cancer Center, The Ohio State University College of Medicine, Columbus, OH 43210, USA. <sup>5</sup>Department of Anatomic Pathology, Department of Molecular Genetics, Taussig Cancer Center, Lerner Research Institute, Cleveland Clinic Foundation, Cleveland, OH 44195, USA.

\*Authors for correspondence (megan@cc-tdi.org; denis.guttridge@osumc.edu; charles@cc-tdi.org)

This is an Open Access article distributed under the terms of the Creative Commons Attribution License (<http://creativecommons.org/licenses/by/3.0>), which permits unrestricted use, distribution and reproduction in any medium provided that the original work is properly attributed.

either by transcriptional activation of cyclin D1 to maintain myoblasts in a cycling state (Dahlman et al., 2009; Guttridge et al., 1999), p65-mediated repression of *MyoD* mRNA or p65-mediated repression of muscle *miR-29* through the myofibrillar transcriptional repressor YinYang1 (YY1) (Wang et al., 2007). During normal myogenesis decreases in phosphorylated I $\kappa$ B $\alpha$  and phosphorylated p65 are observed, indicating a reduction in classical signaling, concomitant with increased alternative signaling as myoblasts begin differentiation and require energy from mitochondrial biogenesis (Bakkar et al., 2008; Guttridge et al., 1999). Increased levels of the p65 subunit of the NF $\kappa$ B complex have been reported in RMS cell lines and patient samples (Wang et al., 2008), suggesting that abnormal signaling of the transcription factor may play an oncogenic role in the disease.

Additionally, NF $\kappa$ B transcriptionally regulates Polycomb group member YY1 through binding of the p50/p65 subunit to the *YY1* promoter (Wang et al., 2007). YY1 epigenetically silences *miR-29*, which is decreased in RMS patient samples and cell lines, and retroviral delivery of *miR-29* to mice injected with Rh30 cells has been shown to slow tumor growth (Wang et al., 2008). These studies further implicate NF $\kappa$ B dysregulation in RMS.

Furthermore, high levels of the p65 subunit in RMS suggest activation of the classical pathway at a time during muscle development when the alternative pathway should be signaling. Although many cancers associate with classical signaling, the use of the alternative pathway in oncogenesis has been previously demonstrated (Demchenko et al., 2010; Nishina et al., 2009; Wharry et al., 2009). If the classical pathway is indeed active in aRMS, this offers a possible explanation for the characteristic undifferentiated morphology observed in patient tumors, the understanding of which may lead to novel therapeutic treatments of this disease.

Here, we attempt to elucidate the relevance of NF $\kappa$ B signaling in RMS initiation and progression, first by using pharmacological

inhibition of the transcription factor *in vitro*. We additionally utilized a genetically engineered mouse model (GEMM) to understand the significance of genetic ablation of NF $\kappa$ B activity on tumor activation and progression, and analyzed combination therapy to potentiate NF $\kappa$ B inactivation.

## RESULTS

### Pharmacological NF $\kappa$ B inhibition reduces cell growth in a spectrum of soft tissue sarcomas

To investigate the role of NF $\kappa$ B in sarcoma, we first conducted a targeted chemical screen on 28 biologically independent mouse, canine and human cell lines and primary cell cultures, including aRMS, eRMS, undifferentiated pleomorphic sarcoma (UPS) and epithelioid sarcoma (EPS) (Table 1). We utilized the NF $\kappa$ B-inhibitor compound BAY 11-7082, which selectively inhibits TNF $\alpha$  phosphorylation of I $\kappa$ B $\alpha$ , effectively blocking the classical signaling pathway and preventing p65 translocation to the nucleus, resulting in abrogation of NF $\kappa$ B DNA-binding ability (Goffi et al., 2005; Lee et al., 2012). BAY 11-7082 resulted in a reduction of cell number in a variety of sarcomas when compared to untreated controls, as measured by CellTiter-Glo luminescent assay. This decrease in cell growth (IC<sub>50</sub>) was observed in most cases at concentrations that were comparable to NF $\kappa$ B-responsive cells in prior studies (8-10  $\mu$ M) (Lee et al., 2012).

### Pharmacological inhibition *in vivo* of NF $\kappa$ B is not efficacious in reducing tumor growth of alveolar RMS orthotopic allografts

Encouraged by the effect of NF $\kappa$ B inhibition on sarcoma tumor samples *in vitro*, we tested the efficacy of NF $\kappa$ B pharmacological inhibition *in vivo* using the NF $\kappa$ B essential modulator (NEMO)-binding domain (NBD) peptide, an independent and selective NF $\kappa$ B inhibitor. The NBD peptide is designed from the C-terminus of the IKK $\beta$  subunit and blocks activation of the IKK complex by

**Table 1. *In vitro* efficacy of a small-molecule NF $\kappa$ B inhibitor on representative soft tissue sarcomas**

| ID                    | Species | Genotype  | BAY 11-7082 IC <sub>50</sub> (nM) |
|-----------------------|---------|-----------|-----------------------------------|
| <b>aRMS</b>           |         |           |                                   |
| U32951                | Mouse   | Myf6Cre   | 1862                              |
| U21459                | Mouse   | Myf6Cre   | 1983                              |
| U20325                | Mouse   | Myf6Cre   | 4474                              |
| U66560                | Mouse   | Myf6Cre   | 4965                              |
| Rh4                   | Human   |           | 4791                              |
| U66176                | Mouse   | Myf6Cre   | 5250                              |
| CW9019                | Human   |           | 5289                              |
| U34295                | Mouse   | Pax7CreER | 5382                              |
| U44927                | Mouse   | Myf6Cre   | 5790                              |
| <b>eRMS</b>           |         |           |                                   |
| U35545                | Mouse   | Myf6Cre   | 345                               |
| RD                    | Human   |           | 4466                              |
| <b>UPS</b>            |         |           |                                   |
| S1-12(PET-00038)      | Dog     |           | 7                                 |
| U28285                | Mouse   | Pax7CreER | 1411                              |
| U35855                | Mouse   | Pax7CreER | 2326                              |
| U34279                | Mouse   | Pax7CreER | 2346                              |
| U29415                | Mouse   | Pax7CreER | 6218                              |
| <b>EPS</b>            |         |           |                                   |
| VA-ES-BJ              | Human   |           | 484                               |
| PCB-490-5             | Human   |           | 768                               |
| PCB-490-4             | Human   |           | 1927                              |
| <b>Retinoblastoma</b> |         |           |                                   |
| PCB 486               | Human   |           | 1477                              |

BAY 11-7082 was tested on a total of 28 alveolar rhabdomyosarcoma (aRMS; 23 mouse, 5 human), 7 embryonal rhabdomyosarcoma (eRMS; 5 mouse, 2 human), 7 undifferentiated pleomorphic sarcoma (UPS; 6 mouse, 1 canine) and 7 epithelioid sarcoma (EPS; 7 human) cell cultures. Only cultures with a 72-h IC<sub>50</sub> less than 10,000 nM are shown. Deeper red colors confer higher sensitivity. P3F, Pax3:Foxo1; P7F, Pax7:Foxo1.

interfering with IKK assembly (di Meglio et al., 2005; Strickland and Ghosh, 2006), thus diminishing NF $\kappa$ B transcriptional ability. NBD has previously been shown to be successful in blocking NF $\kappa$ B activation in mice (Reay et al., 2011).

U48484 mouse aRMS cells harboring the *Pax3:Foxo1* chimeric oncogene were orthotopically allografted in the gastrocnemius muscle of SCID/hairless/outbred (SHO) mice and, when tumors reached 0.25 cm<sup>3</sup>, mice were treated with 10 mg/kg body weight NBD peptide, or vehicle, 3 times per week by intraperitoneal injection. Survival was not extended in the NBD-treated cohort, and tumor growth was not significantly reduced (Fig. 1A). To evaluate disease progression, reverse transcription PCR (RT-PCR) was conducted to examine the amount of *Pax3:Foxo1* mRNA in the

lungs of NBD-treated and untreated mice. We found no significant difference in the total mRNA levels of *Pax3:Foxo1* in the lung, suggesting that the NBD peptide had no overt effect of reducing the rate of hematogenous metastasis (Fig. 1B). This result was confirmed by histological analysis, which showed no difference in the number of lung metastases between the groups (Fig. 1C).

### Genetic ablation of *IKK $\beta$* causes highly aggressive RMS tumors with decreased latency

To specifically test the role of NF $\kappa$ B on initiation and progression of the disease, we utilized a well-characterized aRMS mouse model that conditionally expresses the *Pax3:Foxo1* oncogene as a result of Cre recombination, and deletes *p53* (designated hereafter as *IKK $\beta$ <sup>wt</sup>*), in skeletal muscles. *IKK $\beta$ <sup>wt</sup>* mice develop tumors 100% of the time and faithfully recapitulate the histological phenotype of the human disease. We crossed *IKK $\beta$ <sup>wt</sup>* mice with mice that exhibit reduced NF $\kappa$ B activity owing to ablation of the *IKK $\beta$*  kinase in the presence of Cre recombinase (Acharyya et al., 2007; Mourkioti et al., 2006). The resulting mice harbor the *Pax3:Foxo1* fusion protein, inactivated NF $\kappa$ B and deleted *p53* in skeletal muscles (designated hereafter as *IKK $\beta$ <sup>null</sup>*). Mice were viable and fertile, born in normal Mendelian ratios and developed normally through adolescence. When tumors developed, western blot analysis was performed on primary tumor cell cultures to confirm deletion of the *IKK $\beta$*  protein (Fig. 2C). Out of 17 primary cell cultures tested, 15 exhibited complete *IKK $\beta$*  ablation in the tumor, whereas 1 showed partial reduction, and 1 sample exhibited no decrease of *IKK $\beta$*  protein levels (Table S1). Some level of *IKK $\beta$*  protein from non-muscle cells was expected owing to the fact that tumor was isolated from primary tumor cells that were cultured from whole tumor pieces, which harbor residual stromal and fibroblast cells.

Interestingly, *IKK $\beta$ <sup>null</sup>* mice exhibited a significant decrease in tumor latency (log-rank test,  $P=0.0017$ , Fig. 2A) and a decrease in time from tumor onset to death compared to mice with active *IKK $\beta$* . Fig. 2G,H show the anatomical site and surgical stage of *IKK $\beta$ <sup>null</sup>* mice versus *IKK $\beta$ <sup>wt</sup>*. *IKK $\beta$ <sup>null</sup>* mice exhibited a higher propensity for developing nonmetastatic stage-I tumors of the neck region than their wild-type counterparts.

To confirm that *IKK $\beta$*  deletion was having the intended effect on NF $\kappa$ B inactivation in genetically modified mice, nuclear extracts were prepared from *IKK $\beta$ <sup>wt</sup>* and *IKK $\beta$ <sup>null</sup>* primary tumor cell cultures and EMSA super-shift assay was performed. Results demonstrated that the p65 complex shifted only among the *IKK $\beta$ <sup>wt</sup>* samples (Fig. 2B), indicating that deletion of *IKK $\beta$*  effectively prevents IKK-complex assembly, resulting in NF $\kappa$ B being relegated to the cytoplasm and unable to mediate transcription of target genes.

### *IKK $\beta$ <sup>null</sup>* mice exhibit a histological phenotype similar to *IKK $\beta$ <sup>wt</sup>*

Hematoxylin and eosin (H&E) staining of *IKK $\beta$ <sup>null</sup>* tumors showed a histological appearance similar to *IKK $\beta$ <sup>wt</sup>* tumors (Fig. 2D). Tumors from *IKK $\beta$ <sup>null</sup>* mice exhibited areas of rhabdomyoblastic differentiation mixed with cells generally negative for myogenin, whereas *IKK $\beta$ <sup>wt</sup>* tumors consisted of characteristic clusters of small, round, myogenin-positive aRMS cells (Fig. 2E). Despite the aggressive nature of *IKK $\beta$ <sup>null</sup>* tumors, Ki-67 staining showed no difference in proliferation index when compared to *IKK $\beta$ <sup>wt</sup>* tumors (Fig. 2F), and no difference in frequency of rhabdomyoblasts between cohorts.

### *IKK $\beta$ <sup>wt</sup>* primary tumor samples and cell lines are sensitive to combination therapy with a BCL-2 and NF $\kappa$ B inhibitor

To investigate whether combination drug therapy could potentiate NF $\kappa$ B inactivation, we conducted a synthetic-lethal chemical screen

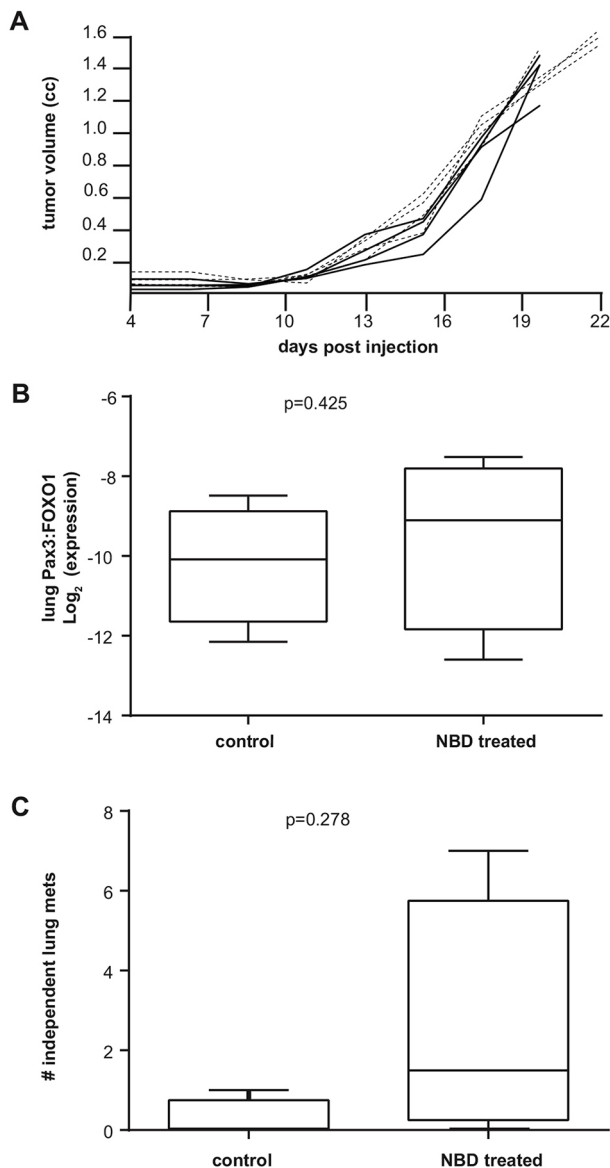

**Fig. 1. In vivo efficacy of an NBD peptide on aRMS.** (A) Tumor growth over time of SHO mice orthotopically allografted with aRMS tumor cells. Mice were treated with NBD peptide (black line;  $n=4$ ; 10 mg/kg 3 $\times$  per week by intraperitoneal injection) or vehicle (dashed line;  $n=4$ ; 100  $\mu$ l PBS 3 $\times$  per week by intraperitoneal route), with endpoint measurement of tumor volume being 1.4cc. (B) qRT-PCR showing mRNA levels of *Pax3:Foxo1* in lungs of mice treated with vehicle or NBD peptide. (C) Number of independent lung metastases counted during histological analysis.

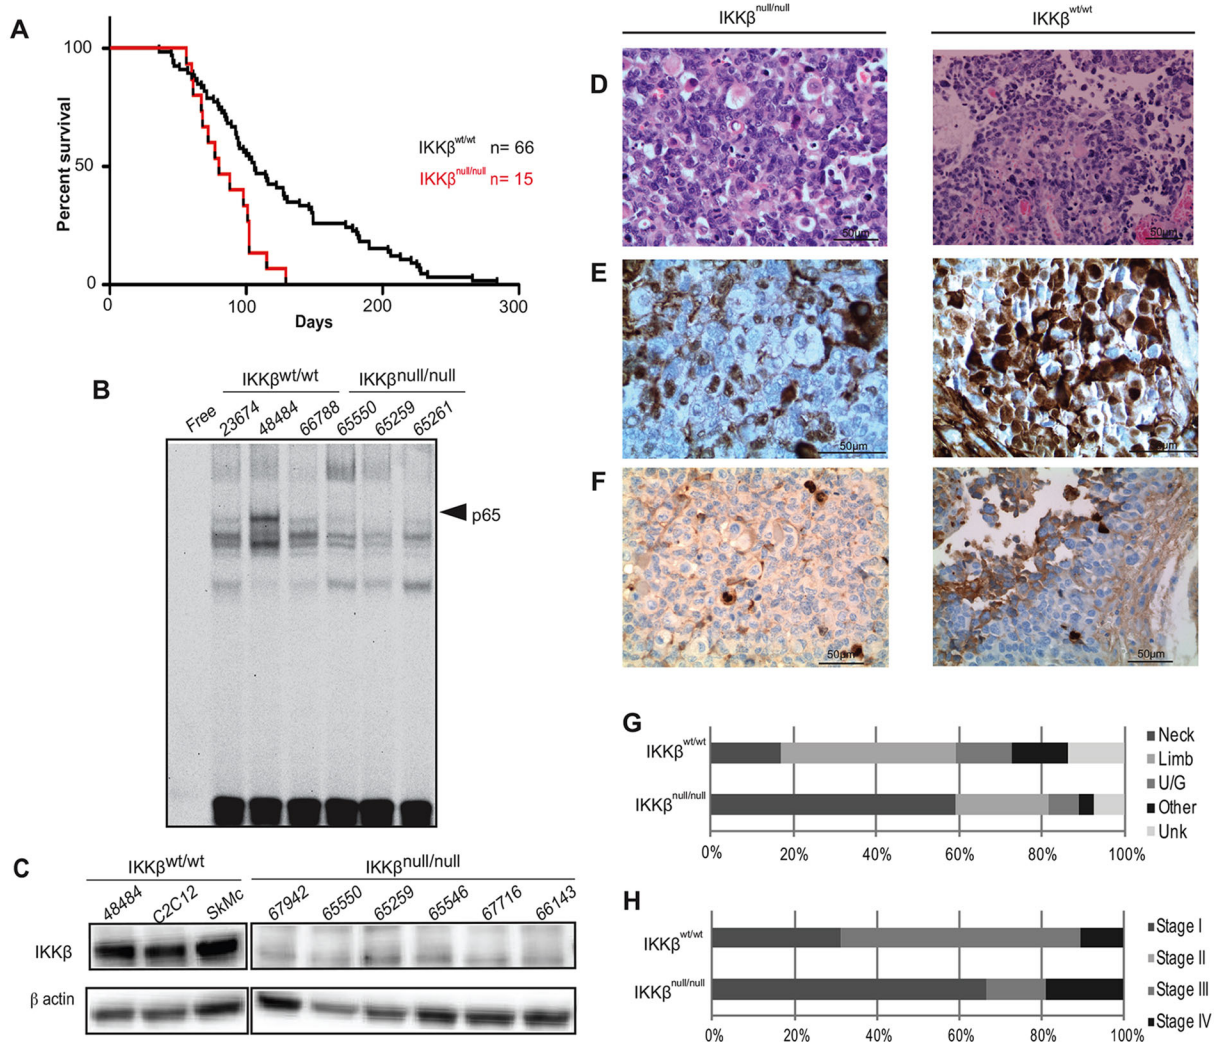

**Fig. 2. *IKKβ* deletion in aRMS.** (A) Kaplan–Meier survival curve of animals with *p53* inactivation and *Pax3:Foxo1* activation in the *Myf6Cre* lineage (*IKK<sup>wt/wt</sup>*) or *IKKβ* loss in combination with *p53* inactivation and *Pax3:Foxo1* activation (*IKK<sup>null/null</sup>*). The addition of *IKKβ* deletion to *Pax3:Foxo1*, *p53* mice significantly decreased tumor latency (paired *t*-test;  $P=0.0017$ ). Conditional deletion of *IKKβ* protein was confirmed by western blot in all animals harboring the *IKKβ<sup>null</sup>* allele. (B) EMSA performed with *IKK<sup>wt/wt</sup>* or *IKKβ<sup>null/null</sup>* cell extracts. Arrowheads denote *p65*/DNA bound complexes. (C) Representative western blot of *IKKβ* protein expression in aRMS mice with *IKKβ<sup>null</sup>* allele. (D–F) Representative images of H&E (D), myogenin (E) or Ki-67 (F) staining on tumors from *IKKβ<sup>null/null</sup>* mice (U65261) compared with those from *IKKβ<sup>wt/wt</sup>* control mice (U66564). (G, H) Anatomical site and tumor stage of tumors in *IKKβ<sup>wt/wt</sup>* control mice compared to those with *IKKβ* deletion. U/G, urogenital; Unk, unknown.

intended to reveal novel targets in aRMS tumors with deleted *IKKβ*. Five of 6 tested aRMS tumor cell samples exhibited sensitivity to the BCL-2 inhibitor navitoclax (Fig. 3A), an orally bioavailable small-molecule protein inhibitor that is currently in Phase 1 trials for recurrent non-small-cell lung carcinoma and recurrent hepatocellular carcinoma, and Phase 2 clinical trials for platinum resistant/refractory ovarian cancer. The  $IC_{50}$  values for the 5 sensitive tumor cell samples treated with navitoclax ranged from 149 to 584 nM. We tested navitoclax in combination with the NF $\kappa$ B inhibitor BAY 11-7082 in the human aRMS cell lines Rh41 and Rh30, and mouse *IKKβ<sup>wt/wt</sup>* aRMS culture U66788 (Fig. 3B). Synergy (combination index <1) was detected in each of the three samples for navitoclax in the range of 0.08–0.156  $\mu$ M and BAY 11-7082 in the range of 5–10  $\mu$ M.

## DISCUSSION

We sought to explore the role of NF $\kappa$ B in aRMS disease progression, at first with a small-molecule compound, then with a

peptide therapeutic, and finally by a genetic approach. The studies converged on the finding that canonical NF $\kappa$ B signaling plays no appreciable single pathway role in tumor progression. Interestingly, deletion of *IKKβ*, thereby inactivating classical NF $\kappa$ B signaling, facilitated tumor initiation, best characterizing its role as a cooperative initiating mutation/event.

The *Myf6Cre*, conditional *Pax3:Foxo1*, conditional *p53* (aRMS) GEMM is well characterized and has effectively demonstrated the requirement (or lack thereof) of various pathways for RMS progression. Notably, the addition of conditional *Rb1* loss to the aRMS GEMM was found to be a disease modifier but not sufficient for initiation of sarcomagenesis (Kikuchi et al., 2013), even though *Rb1* gene mutation is frequently reported in eRMS (Rubin et al., 2011; Kohashi et al., 2008). Additionally, targets such as PDGFRA, which are typically overexpressed in clinical cases of RMS, appear crucial to tumor progression when tested *in vitro* (Taniguchi et al., 2008). However, when conditionally deleted from the aRMS GEMM, *PDGFRA*-null mice exhibit an earlier onset and increase in tumor

**A**

| Target                             | Drug                             | U65261<br>aRMS<br>IKK $\beta$ null<br>mouse | U67122<br>aRMS<br>IKK $\beta$ null<br>mouse | U65749<br>aRMS<br>IKK $\beta$ null<br>mouse | U66560<br>aRMS<br>IKK $\beta$ WT<br>mouse | U32951<br>aRMS<br>IKK $\beta$ WT<br>mouse | U21459<br>aRMS<br>IKK $\beta$ WT<br>mouse | C2C12<br>myoblast<br>mouse | SKMc<br>myoblast<br>human |
|------------------------------------|----------------------------------|---------------------------------------------|---------------------------------------------|---------------------------------------------|-------------------------------------------|-------------------------------------------|-------------------------------------------|----------------------------|---------------------------|
| H3K27 histone demethylase          | <b>GSK-J4 HCl</b>                | 1758                                        | 6132                                        | 4640                                        | 10000                                     | 1372                                      | 1390                                      | 6410                       | 10000                     |
| AURKA/B/C                          | <b>Tozasetib</b>                 | 10000                                       | 870                                         | 2990                                        | 1616                                      | 356                                       | 10000                                     | 57                         | 2613                      |
| Kit, PDGFR, SFK, Bcr-Abl           | <b>Dasatinib</b>                 | 38                                          | 71                                          | 2970                                        | 8762                                      | 2272                                      | 10000                                     | 210                        | 48                        |
| <b>BCL-2, BCL-XL, and BCL-W</b>    | <b>Navitoclax</b>                | 584                                         | 149                                         | 200                                         | 4816                                      | 585                                       | 197                                       | 10000                      | 10000                     |
| BRD                                | <b>JQ1</b>                       | 10000                                       | 1000                                        | 1620                                        | 155                                       | 139                                       | 10000                                     | 7                          | 10000                     |
| Casein Kinase 2                    | <b>CX-4945</b>                   | 10000                                       | 10000                                       | 10000                                       | 10000                                     | 4747                                      | 10000                                     | 4101                       | 1134                      |
| CCR5                               | <b>Maraviroc</b>                 | 10000                                       | 10000                                       | 10000                                       | 10000                                     | 10000                                     | 10000                                     | 10000                      | 10000                     |
| CDK1/2; MuSK                       | <b>Cdk1/2 inhibitor III</b>      | 10000                                       | 10000                                       | 10000                                       | 10000                                     | 6122                                      | 10000                                     | 1443                       | 289                       |
| CDK4/6                             | <b>PD 0332991</b>                | 10000                                       | 4979                                        | 10000                                       | 10000                                     | 10000                                     | 10000                                     | 10000                      | 10000                     |
| CDKs                               | <b>Dinaciclib</b>                | 24                                          | 21                                          | 10                                          | 23                                        | 13                                        | 14                                        | 1                          | 10000                     |
| Chk1                               | <b>LY2606368</b>                 | 4661                                        | 1037                                        | 1640                                        | 1016                                      | 906                                       | 1117                                      | 1325                       | 1284                      |
| CMV                                | <b>Ganciclovir</b>               | 10000                                       | 10000                                       | 10000                                       | 10000                                     | 10000                                     | 10000                                     | 10000                      | 10000                     |
| NF $\kappa$ B                      | <b>BAY-11-7082</b>               | 2944                                        | 10000                                       | 10000                                       | 4965                                      | 1862                                      | 1983                                      | 10000                      | 10000                     |
| DNA methylation                    | <b>Zebularine</b>                | 10000                                       | 10000                                       | 10000                                       | 10000                                     | 10000                                     | 10000                                     | 10000                      | 10000                     |
| DOT1L                              | <b>SGC0946</b>                   | 1                                           | 1616                                        | 1510                                        | 607                                       | 1386                                      | 1                                         | 59                         | 98                        |
| EZH2                               | <b>GSK126</b>                    | 1                                           | 4539                                        | 7020                                        | 3605                                      | 5004                                      | 10000                                     | 10000                      | 432                       |
| FAK                                | <b>PF 573228</b>                 | 10000                                       | 10000                                       | 10000                                       | 10000                                     | 10000                                     | 10000                                     | 759                        | 10000                     |
| FGFR1-4                            | <b>LY2874455</b>                 | 1                                           | 72                                          | 1590                                        | 687                                       | 4678                                      | 10000                                     | 367                        | 10000                     |
| GSK3 $\beta$                       | <b>BIO</b>                       | 1                                           | 10000                                       | 10000                                       | 10000                                     | 10000                                     | 10000                                     | 10000                      | 1671                      |
| GSK3 $\beta$                       | <b>LY2090314</b>                 | 1065                                        | 982                                         | 10000                                       | 10000                                     | 107                                       | 468                                       | 396                        | 196                       |
| AMPKA                              | <b>Metformin HCL</b>             | 10000                                       | 10000                                       | 10000                                       | 10000                                     | 10000                                     | 10000                                     | 10000                      | 10000                     |
| HDAC6 (histone, protein targeting) | <b>Tubastatin A</b>              | 10000                                       | 10000                                       | 10000                                       | 10000                                     | 10000                                     | 10000                                     | 10000                      | 10000                     |
| Survivin                           | <b>YM155</b>                     | 706                                         | 1014                                        | 300                                         | 400                                       | 371                                       | 362                                       | 2175                       | 276                       |
| HDACs                              | <b>Panobinostat</b>              | 29                                          | 5                                           | 20                                          | 20                                        | 8                                         | 13                                        | 90                         | 176                       |
| histone lysine demethylases        | <b>L-a-Hydroxyglutaric acid</b>  | 10000                                       | 10000                                       | 10000                                       | 10000                                     | 10000                                     | 10000                                     | 10000                      | 10000                     |
| histone-lysine methyltransferase   | <b>BIX 01294</b>                 | 961                                         | 938                                         | 790                                         | 1356                                      | 187                                       | 1396                                      | 2015                       | 143                       |
| TORC1/2                            | <b>INK 128</b>                   | 105                                         | 117                                         | 100                                         | 423                                       | 96                                        | 83                                        | 39                         | 13                        |
| HMG2                               | <b>Netropsin Dihydrochloride</b> | 10000                                       | 10000                                       | 10000                                       | 10000                                     | 10000                                     | 10000                                     | 10000                      | 10000                     |
| Igf1r                              | <b>OSI-906</b>                   | 10000                                       | 10000                                       | 10000                                       | 10000                                     | 10000                                     | 10000                                     | 10000                      | 10000                     |
| JAK2                               | <b>Ruxolitinib</b>               | 10000                                       | 10000                                       | 10000                                       | 10000                                     | 10000                                     | 10000                                     | 10000                      | 10000                     |
| Wee1                               | <b>MK-1775</b>                   | 974                                         | 272                                         | 1610                                        | 948                                       | 837                                       | 147                                       | 1699                       | 157                       |
| KDM4                               | <b>JIB-04</b>                    | 105                                         | 718                                         | 330                                         | 812                                       | 242                                       | 375                                       | 552                        | 1407                      |
| nuclear export                     | <b>CRM1 Inhibitor III</b>        | 4462                                        | 1275                                        | 10000                                       | 10000                                     | 10000                                     | 2870                                      | 1100                       | 10000                     |
| Leukotriene B4                     | <b>LY293111</b>                  | 10000                                       | 10000                                       | 10000                                       | 10000                                     | 10000                                     | 10000                                     | 1859                       | 10000                     |
| LSD1                               | <b>LSD1 Inhibitor IV</b>         | 447                                         | 10000                                       | 3090                                        | 10000                                     | 10000                                     | 10000                                     | 10000                      | 10000                     |
| Notch                              | <b>RO4929097</b>                 | 10000                                       | 10000                                       | 10000                                       | 10000                                     | 10000                                     | 10000                                     | 10000                      | 3754                      |
| MEK                                | <b>Trametinib</b>                | 12                                          | 1078                                        | 10000                                       | 1080                                      | 194                                       | 920                                       | 430                        | 923                       |

resistant sensitive

**Fig. 3. Chemical screens for complementation of IKK genetic deletion.** (A) Navitoclax (bold) was efficacious in abrogating tumor cell growth in aRMS tumors that expressed both active and inactive NF $\kappa$ B. Deeper red colors confer higher sensitivity. All concentrations listed are in nM. The complete results are listed in Table S2. (B) Combination indices reflecting mouse and human aRMS cell lines. A combination index 0<1 represents a synergistic combination, 1 represents a neutral combination, and 1>2.5 is antagonistic. Synergistic combinations were achieved at doses within the reported active NF $\kappa$ B inhibitory range.

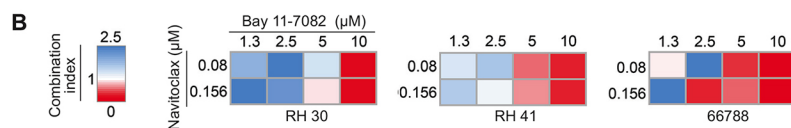

progression compared to those with intact *PDGFRA* (Abraham et al., 2012). *IKK $\beta$*  deletion was similarly informative in these studies.

Previous studies (Wang et al., 2008) were performed in Rh30, a 1987 cell line with gain of Pax3:Foxo1 and loss of p53 function, akin to our transgenic model. In those studies, miR-29b was overexpressed in the xenograft model and tumor growth slowed over a timescale of 20 days. The difference between these micro-RNA studies and the genetically deleted *IKK $\beta$*  studies might be explained by effects of miR-29b beyond NF $\kappa$ B signaling.

Our results point to NF $\kappa$ B still having a role in progression, but as a modifier of disease given that a synthetic-lethal interaction for Bcl2 inhibitors was seen for *IKK $\beta$ <sup>null</sup>* aRMS primary cell cultures. This remains an area of open investigation.

## MATERIALS AND METHODS

### Drug sensitivity assays

For the BAY 11-7082 drug screen, mouse, human and canine primary tumor cell cultures were plated in a 96-well plate at 2500 cells/well. After 24 h, cells were incubated with varying concentrations of BAY 11-7082 (Selleckchem, Houston, TX, USA) for 72 h. CellTiter96 Aqueous One Cell Proliferation Assay (MTS) (Promega, Madison, WI, USA) was performed according to

manufacturer's instructions, and a BioTek Synergy 2 plate reader (BioTek, Winooski, VT, USA) was used to evaluate the cytotoxic effect of the drugs. All concentrations were plated in triplicate. For synergistic combinational drug screens, mouse RMS primary tumor cell cultures (U65845; U66788) and human RMS cell lines (Rh30; Rh41) were plated and assayed as described above, with varying concentrations of Navitoclax (Selleckchem, Houston, TX, USA) or BAY 11-7082 (Selleckchem, Boston, MA, USA).

### Western blotting

Whole-cell lysate was taken from tumor cell cultures and cell lines when cells were 70% confluent at passage  $\leq$ 5. Cells were rinsed with cold HyClone phosphate-buffered saline (PBS; Fisher Scientific, Waltham, MA, USA), scraped, and lysed with radioimmunoprecipitation (RIPA) buffer supplemented with a cocktail of protease inhibitors and serine/threonine and tyrosine phosphatase inhibitors (Fisher Scientific). Protein supernatants were separated by 7.5% Mini-Protean pre-cast gels (Bio-Rad, Hercules, CA, USA) at 120 V for 1.5 h then transferred onto a PVDF membrane at 100 V for 1 h. The membrane was then blocked with 5% nonfat skim milk in TBS-T for 1 h then incubated overnight in primary antibody. Primary antibodies used were: mouse  $\beta$ -actin (1:10,000, A1978, Sigma Aldrich, St Louis, MO, USA); mouse *IKK $\beta$*  (1:250, IMG-129A, Novus Biologicals, Littleton, CO, USA); mouse myosin heavy chain (clone MF20) (1:500, MAb4470, R&D

Systems, Minneapolis, MN, USA); and phospho-p65 (1:1000, 4025, Cell Signaling, Danvers, MA, USA).

### Cell culture

All mouse derived primary tumor cell cultures were generated as previously described (Taniguchi et al., 2008) and used at passage <5. Briefly, tumors were digested with 1% collagenase IV (17104019, Sigma Aldrich, St Louis, MO, USA) in Gibco Dulbecco's modified Eagle's medium (DMEM) (11965092, Thermo Fisher Scientific, Waltham, MA, USA) overnight then passed through a 70  $\mu$ M cell strainer into a 10 cm tissue culture treated dish. Cells were maintained in DMEM supplemented with 10% fetal bovine serum (FBS; 10438034, Thermo Fisher Scientific) and 1% Gibco PenStrep (15140122, Thermo Fisher Scientific) at 5% CO<sub>2</sub> in air at 37°C. The human RMS cell lines Rh30 and Rh41 were generously provided by the Houghton Laboratory at St Jude's Cancer Research Hospital (Memphis, TN, USA). Human SkMc cells were obtained from Lonza (cc-2561, Walkersville, MD, USA). C2C12 mouse myoblast cells were purchased from the American Type Culture Collection (CRL-1772, Manassas, VA, USA).

### Mice

All animal procedures were conducted in accordance with the Guidelines for the Care and Use of Laboratory Animals and were approved by the Institutional Animal Care and Use Committee (IACUC) and housed at Oregon Health & Science University. The *Myf6Cre*, conditional *Pax3:Foxo1*, conditional *p53*, and *IKK $\beta$ <sup>null</sup>* mouse lines and corresponding genotyping protocols have been described previously (Keller et al., 2004a; Keller and Capecchi, 2004; Mourkioti et al., 2006; Nishijo et al., 2009; Pasparakis et al., 2002). Owing to the sudden onset and aggressive nature of these tumors, tumor-prone mice were visually inspected every 2 days. Tumor staging was based on a previously described adaptation of the Intergroup Rhabdomyosarcoma Study Group Staging system.

### In vivo study with NBD peptide

Female SCID/Hairless/Outbred mice were purchased from Charles River Laboratory (Crl:SHO-Prkdc<sup>scid</sup> Hr<sup>hr</sup>, Wilmington, MA, USA) at 8 weeks of age and were injected with cardiotoxin (217503, EMD Millipore, Bellerica, MA, USA) into the gastrocnemius muscle. After 24 h, 1 $\times$ 10<sup>6</sup> U48484 mouse aRMS cells were injected into the same muscle. Tumor volume measurements were taken 3 times weekly and, when tumor volume reached 0.25 cm<sup>3</sup>, mice were given either 10 mg/kg body weight NBD peptide or an equal volume of PBS vehicle by intraperitoneal injection every other day. When tumor volume reached 1.5 cm<sup>3</sup>, mice were humanely euthanized and tissue samples were collected.

### RNA isolation and quantitative RT-PCR (qRT-PCR)

Probes set for mouse tissue samples were *Gapdh*-Mm99999915\_g1, and *Pax3:Foxo1* 5'-6-FAM-AATTCGCCACCAATCTGTCCCTTCA-TAMRA-3'. From whole-tumor chunks, total RNA was isolated using Trizol (15596018, Thermo Fisher Scientific) following the manufacturer's instructions. The RNeasy mini kit (74104, Qiagen, Valencia, CA, USA) was then used to process RNA to cDNA. Mouse *Gapdh* was used as a control for relative gene expression and the mean of three experimental replicates per specimen was used to calculate the ratio of gene of interest/*Gapdh* expression for the Taqman assay using Bio-Rad CFX Manager software.

### EMSA super-shift assay

EMSA was performed as previously described (Guttridge et al., 1999). Briefly, nuclear extracts were prepared from *IKK $\beta$ <sup>wt/wt</sup>* and *IKK $\beta$ <sup>null/null</sup>* mice and incubated with 20,000 cpm of radiolabeled probes. A rabbit polyclonal antibody against the p65 subunit (100-4165, Rockland, Gilbertsville, PA, USA) of NF $\kappa$ B was incubated with nuclear extracts for 15 min prior to the addition of poly(dI-dC) and a <sup>32</sup>P-labeled probe. Complexes were resolved on a 5% polyacrylamide gel in Tris-glycine buffer (25 mM Tris, 190 mM glycine, 1 mM EDTA) at 25 mA for 2-3 h at room temperature. The gels were dried and exposed on film for approximately 1-3 days.

### Acknowledgements

We thank Al Baldwin for comments made early in our study.

### Competing interests

The authors declare no competing or financial interests.

### Author contributions

Conceptualization: D.C.G., C.K.; Formal analysis: M.M.C.; Investigation: M.M.C., A.M., T.S., Y.L., K.G., M.N.S., B.P.R.; Data curation: M.M.C.; Writing - original draft: M.M.C.; Writing - review & editing: M.M.C., D.C.G., C.K.; Visualization: M.M.C.; Supervision: D.C.G., C.K.; Funding acquisition: D.C.G., C.K.

### Funding

This work was supported by the National Institutes of Health (5R01CA143082).

### Supplementary information

Supplementary information available online at <http://dmm.biologists.org/lookup/doi/10.1242/dmm.030882.supplemental>

### References

- Abraham, J., Chua, Y. X., Glover, J. M., Tyner, J. W., Loriaux, M. M., Kilcoyne, A., Giles, F. J., Nelson, L. D., Carew, J. S., Ouyang, Y. et al. (2012). An adaptive Src-PDGFR $\alpha$ -Raf axis in rhabdomyosarcoma. *Biochem. Biophys. Res. Commun.* **426**, 363-368.
- Abraham, J., Nuñez-Álvarez, Y., Hettmer, S., Carrió, E., Chen, H.-I. H., Nishijo, K., Huang, E. T., Prajapati, S. I., Walker, R. L., Davis, S. et al. (2014). Lineage of origin in rhabdomyosarcoma informs pharmacological response. *Genes Dev.* **28**, 1578-1591.
- Acharyya, S., Villalta, S. A., Bakkar, N., Bupha-Intr, T., Janssen, P. M. L., Carathers, M., Li, Z.-W., Beg, A. A., Ghosh, S., Sahenk, Z. et al. (2007). Interplay of IKK/NF- $\kappa$ B signaling in macrophages and myofibers promotes muscle degeneration in Duchenne muscular dystrophy. *J. Clin. Invest.* **117**, 889-901.
- Bakkar, N. and Guttridge, D. C. (2010). NF- $\kappa$ B signaling: a tale of two pathways in skeletal myogenesis. *Physiol. Rev.* **90**, 495-511.
- Bakkar, N., Wang, J., Ladner, K. J., Wang, H., Dahlman, J. M., Carathers, M., Acharyya, S., Rudnicki, M. A., Hollenbach, A. D. and Guttridge, D. C. (2008). IKK/NF- $\kappa$ B regulates skeletal myogenesis via a signaling switch to inhibit differentiation and promote mitochondrial biogenesis. *J. Cell Biol.* **180**, 787-802.
- Baldwin, A. S. Jr. (1996). The NF- $\kappa$ B and I  $\kappa$ B proteins: new discoveries and insights. *Annu. Rev. Immunol.* **14**, 649-683.
- Breifeld, P. P. and Meyer, W. H. (2005). Rhabdomyosarcoma: new windows of opportunity. *Oncologist* **10**, 518-527.
- Dahlman, J. M., Wang, J., Bakkar, N. and Guttridge, D. C. (2009). The RelA/p65 subunit of NF- $\kappa$ B specifically regulates cyclin D1 protein stability: Implications for cell cycle withdrawal and skeletal myogenesis. *J. Cell. Biochem.* **106**, 42-51.
- Davis, R. J., Lovell, M. A., Biegel, J. A. and Barr, F. G. (1994). Fusion of PAX7 to FKHR by the variant t(1;13)(p36;q14) translocation in alveolar rhabdomyosarcoma. *Cancer Res.* **54**, 2869-2872.
- Demchenko, Y. N., Glebov, O. K., Zingone, A., Keats, J. J., Bergsagel, P. L. and Kuehl, W. M. (2010). Classical and/or alternative NF- $\kappa$ B pathway activation in multiple myeloma. *Blood* **115**, 3541.
- Di Marco, S., Dallaire, P., Chittur, S., Tenenbaum, S. A., Radzioch, D., Marette, A. and Gallouzi, I.-E. (2005). NF- $\kappa$ B-mediated MyoD decay during muscle wasting requires nitric oxide synthase mRNA stabilization, HuR protein, and nitric oxide release. *Mol. Cell. Biol.* **25**, 6533-6545.
- di Meglio, P., Ianaro, A. and Ghosh, S. (2005). Amelioration of acute inflammation by systemic administration of a cell-permeable peptide inhibitor of NF- $\kappa$ B activation. *Arthritis. Rheum.* **52**, 951-958.
- Dolcet, X., Llobet, D., Pallares, J. and Matias-Guiu, X. (2005). NF- $\kappa$ B in development and progression of human cancer. *Virchows Arch.* **446**, 475-482.
- Galili, N., Davis, R. J., Fredericks, W. J., Mukhopadhyay, S., Rauscher, F. J., Emanuel, B. S., Rovera, G. and Barr, F. G. (1993). Fusion of a fork head domain gene to PAX3 in the solid tumour alveolar rhabdomyosarcoma. *Nat. Genet.* **5**, 230-235.
- Ghosh, S., May, M. J. and Kopp, E. B. (1998). NF- $\kappa$ B and Rel proteins: evolutionarily conserved mediators of immune responses. *Annu. Rev. Immunol.* **16**, 225-260.
- Goffi, F., Boroni, F., Benarese, M., Sarnico, I., Benetti, A., Spano, P. F. and Pizzi, M. (2005). The inhibitor of I $\kappa$ B kinase phosphorylation BAY 11-7082 prevents NMDA neurotoxicity in mouse hippocampal slices. *Neurosci. Lett.* **377**, 147-151.
- Guttridge, D. C., Albanese, C., Reuther, J. Y., Pestell, R. G. and Baldwin, A. S. (1999). NF- $\kappa$ B controls cell growth and differentiation through transcriptional regulation of Cyclin D1. *Mol. Cell. Biol.* **19**, 5785-5799.
- Hayden, M. S. and Ghosh, S. (2004). Signaling to NF- $\kappa$ B. *Genes Dev.* **18**, 2195-2224.
- Keller, C. and Capecchi, M. R. (2004). New genetic tactics to model alveolar rhabdomyosarcoma in the mouse. *Cancer Res.* **65**, 3.

- Keller, C., Arenkiel, B. R., Coffin, C. M., El-Bardeesy, N., DePinho, R. A. and Capecchi, M. R. (2004a). Alveolar rhabdomyosarcomas in conditional Pax3:Fkhr mice: cooperativity of Ink4a/ARF and Trp53 loss of function. *Genes Dev.* **18**, 2614-2626.
- Keller, C., Hansen, M. S., Coffin, C. M. and Capecchi, M. R. (2004b). Pax3:Fkhr interferes with embryonic Pax3 and Pax7 function: implications for alveolar rhabdomyosarcoma cell of origin. *Genes Dev.* **18**, 2608-2613.
- Kikuchi, K., Taniguchi, E., Chen, H.-I., Svalina, M. N., Abraham, J., Huang, E. T., Nishijo, K., Davis, S., Loudon, C., Zarzabal, L. A. et al. (2013). Rb1 loss modifies but does not initiate alveolar rhabdomyosarcoma. *Skelet Muscle* **3**, 27.
- Kohashi, K., Oda, Y., Yamamoto, H., Tamiya, S., Takahira, T., Takahashi, Y., Tajiri, T., Taguchi, T., Suita, S., Tsuneyoshi, M. (2008) Alterations of RB1 gene in embryonal and alveolar rhabdomyosarcoma: special reference to utility of pRB immunoreactivity in differential diagnosis of rhabdomyosarcoma subtype. *J Cancer Res. Clin. Oncol.* **134**, 1097-1103.
- Lee, J., Rhee, M. H., Kim, E. and Cho, J. Y. (2012). BAY 11-7082 is a broad-spectrum inhibitor with anti-inflammatory activity against multiple targets. *Mediat. Inflamm.* **2012**, 416036.
- Liou, H. C. (2002). Regulation of the immune system by NF-kappaB and I kappaB. *J. Biochem. Mol. Biol.* **35**, 537-546.
- Malempati, S. and Hawkins, D. S. (2012). Rhabdomyosarcoma: review of the Children's Oncology Group (COG) soft-tissue sarcoma committee experience and rationale for current COG studies. *Pediatr. Blood Cancer* **59**, 5-10.
- Mourkioti, F., Kratsios, P., Luedde, T., Song, Y.-H., Delafontaine, P., Adami, R., Parente, V., Bottinelli, R., Pasparakis, M. and Rosenthal, N. (2006). Targeted ablation of IKK2 improves skeletal muscle strength, maintains mass, and promotes regeneration. *J. Clin. Invest.* **116**, 2945-2954.
- Nishijo, K., Chen, Q.-R., Zhang, L., McCleish, A. T., Rodriguez, A., Cho, M. J., Prajapati, S. I., Gelfond, J. A. L., Chisholm, G. B., Michalek, J. E. et al. (2009). Credentialing a preclinical mouse model of alveolar rhabdomyosarcoma. *Cancer Res.* **69**, 2902-2911.
- Nishina, T., Yamaguchi, N., Gohda, J., Semba, K. and Inoue, J.-I. (2009). NIK is involved in constitutive activation of the alternative NF-kB pathway and proliferation of pancreatic cancer cells. *Biochem. Biophys. Res. Commun.* **388**, 96-101.
- Ognjanovic, S., Linabery, A. M., Charbonneau, B. and Ross, J. A. (2009). Trends in childhood rhabdomyosarcoma incidence and survival in the United States, 1975-2005. *Cancer* **115**, 4218-4226.
- Pasparakis, M., Courtois, G., Hafner, M., Schmidt-Suppran, M., Nenci, A., Toksoy, A., Krampert, M., Goebeler, M., Gillitzer, R., Israel, A. et al. (2002). TNF-mediated inflammatory skin disease in mice with epidermis-specific deletion of IKK2. *Nature* **417**, 861-866.
- Perkins, N. D. (2006). Post-translational modifications regulating the activity and function of the nuclear factor kappa B pathway. *Oncogene* **25**, 6717-6730.
- Qualman, S., Bridge, J., Parham, D., Teot, L., Meyer, W. and Pappo, A. (2008). Prevalence and clinical impact of anaplasia in childhood rhabdomyosarcoma: a report from the Soft Tissue Sarcoma Committee of the Children's Oncology Group. *Cancer* **113**, 3242-3247.
- Reay, D. P., Yang, M., Watchko, J. F., Daoood, M., O'Day, T. L., Rehman, K. K., Guttridge, D. C., Robbins, P. D. and Clemens, P. R. (2011). Systemic delivery of NEMO binding domain/IKK $\gamma$  inhibitory peptide to young mdx mice improves dystrophic skeletal muscle histopathology. *Neurobiol. Dis.* **43**, 598-608.
- Reis LAG, S. M., Gurney, J. G., Linet, M., Tamra, T., Young, J. L. and Bunin, G. R. (1999). *Cancer Incidence and Survival among Children and Adolescents: United States SEER Program 1975-1995*. Bethesda, MD: National Cancer Institute, SEER Program. NIH Pub. No. 99-4649.
- Rubin, B., Nishijo, K., Chen, H. I., Yi, X., Schuetze, D. P., Pal, R., Prajapati, S. I., Abraham, J., Arenkiel, B. R., Chen, Q. R. et al. (2011) Evidence for an unanticipated relationship between undifferentiated pleomorphic sarcoma and embryonal rhabdomyosarcoma. *Cancer Cell* **19**, 177-191.
- Strickland, I. and Ghosh, S. (2006). Use of cell permeable NBD peptides for suppression of inflammation. *Ann. Rheum. Dis.* **65** Suppl. 3, iii75-iii82.
- Taniguchi, E., Nishijo, K., McCleish, A. T., Michalek, J. E., Grayson, M. H., Infante, A. J., Abboud, H. E., Legallo, R. D., Qualman, S. J., Rubin, B. P. et al. (2008). PDGFR-A is a therapeutic target in alveolar Rhabdomyosarcoma. *Oncogene* **27**, 6550.
- Wang, H., Hertlein, E., Bakkar, N., Sun, H., Acharyya, S., Wang, J., Carathers, M., Davuluri, R. and Guttridge, D. C. (2007). NF-kB regulation of YY1 inhibits skeletal myogenesis through transcriptional silencing of myofibrillar genes. *Mol. Cell. Biol.* **27**, 4374-4387.
- Wang, H., Garzon, R., Sun, H., Ladner, K. J., Singh, R., Dahlman, J., Cheng, A., Hall, B. M., Qualman, S. J., Chandler, D. S. et al. (2008). NF-kB-YY1-miR-29 regulatory circuitry in skeletal myogenesis and rhabdomyosarcoma. *Cancer Cell* **14**, 369-381.
- Wang, J., Jacob, N. K., Ladner, K. J., Beg, A., Perko, J. D., Tanner, S. M., Liyanarachchi, S., Fishel, R. and Guttridge, D. C. (2009). RelA/p65 functions to maintain cellular senescence by regulating genomic stability and DNA repair. *EMBO Rep.* **10**, 1272-1278.
- Wharry, C. E., Haines, K. M., Carroll, R. G. and May, M. J. (2009). Constitutive non-canonical NF-kB signaling in pancreatic cancer cells. *Cancer Biol. Ther.* **8**, 1567-1576.
- Xiao, G., Fong, A. and Sun, S.-C. (2004). Induction of p100 Processing by NF-kB-Inducing Kinase Involves Docking I $\kappa$ B Kinase  $\alpha$  (IKK $\alpha$ ) to p100 and IKK $\alpha$ -mediated Phosphorylation. *J. Biol. Chem.* **279**, 30099-30105.
